# Supplementary material for: Solution-phase phosphorus substitution for enhanced oxygen evolution reaction in Cu2WS4
Source: Royal Society of Chemistry journal article supplement (doi:10.1039/c8ra09261c), 2019-01-01
Supplement: c8ra09261c1.pdf [file c8ra09261c1.pdf]

## *Supporting Information*

### ***Solution-phase phosphorus substitution for enhanced oxygen evolution reaction in $\text{Cu}_2\text{WS}_4$***

*Travis G. Novak,<sup>1</sup> Om Prakash,<sup>2</sup> Anand P. Tiwari,<sup>1\*</sup> and Seokwoo Jeon<sup>1\*</sup>*

1. Department of Materials Science and Engineering, KAIST Institute for The Nanocentury, Advanced Battery Center, KAIST, Daejeon 305-701, Republic of Korea.
2. Department of Inorganic and Physical Chemistry, Indian Institute of Sciences, Bengaluru 560012, India

\* Corresponding author: [jeon39@kaist.ac.kr](mailto:jeon39@kaist.ac.kr) (S. Jeon), [anand@kaist.ac.kr](mailto:anand@kaist.ac.kr) (A. P. Tiwari)

Fax: (+) 82-42-350-3310; Tel: (+) 82-42-350-3342.

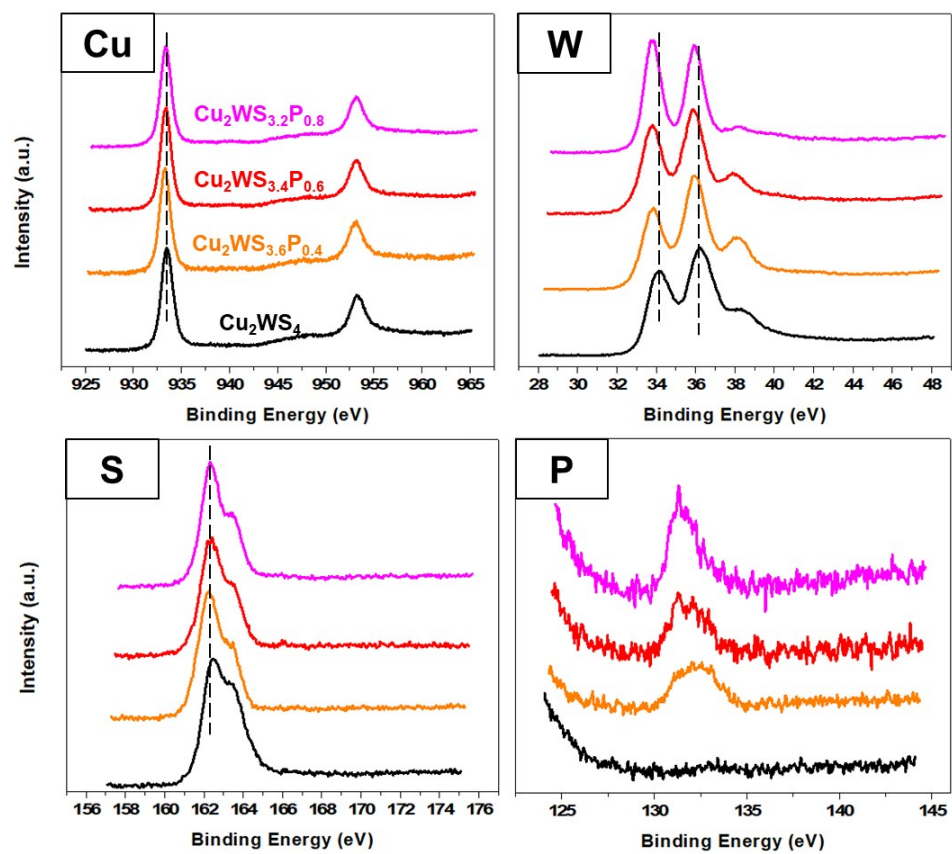

**Figure S1:** XPS elements scans of Cu, W, S, P for all 4 samples.

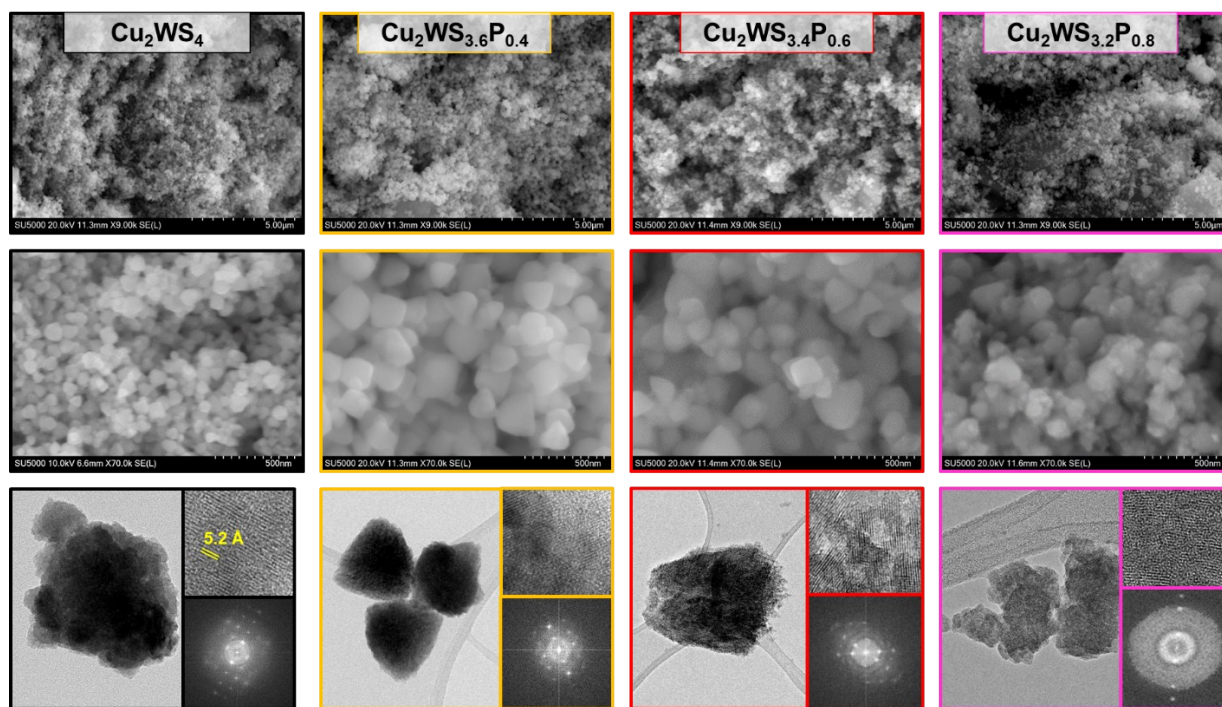

**Figure S2:** Complete SEM and TEM images, with FFT patterns inset.

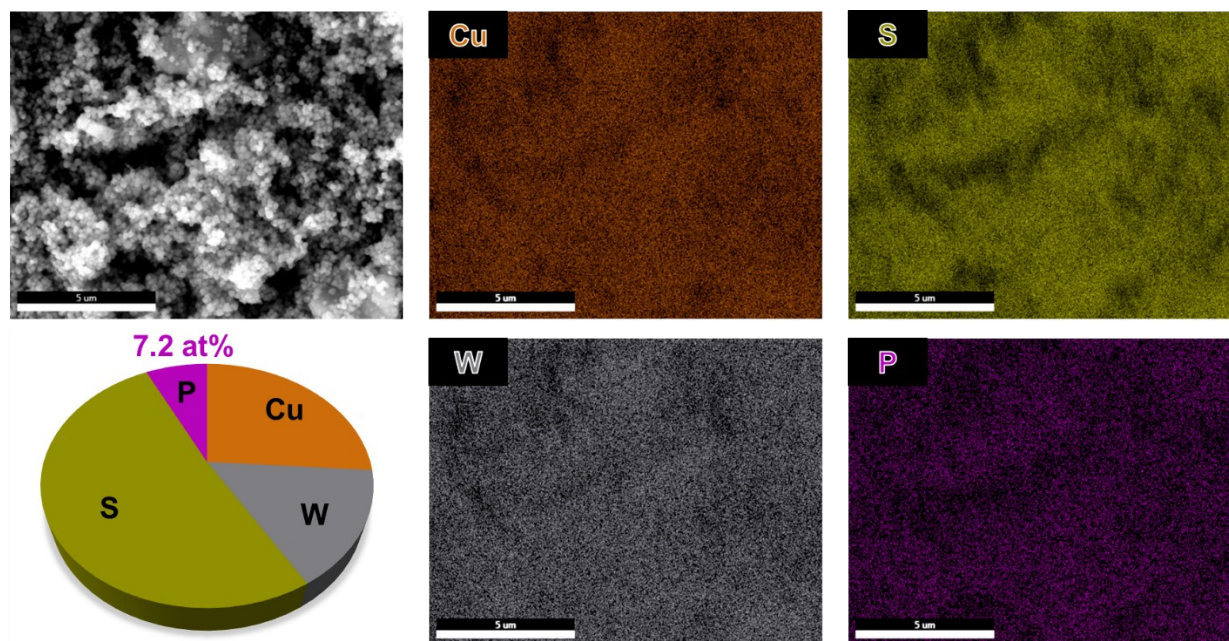

**Figure S3:** SEM image with elemental EDS mapping showing a uniform dispersion of P. The at% of P was calculated to be  $\sim 7.2$  based on EDS data.

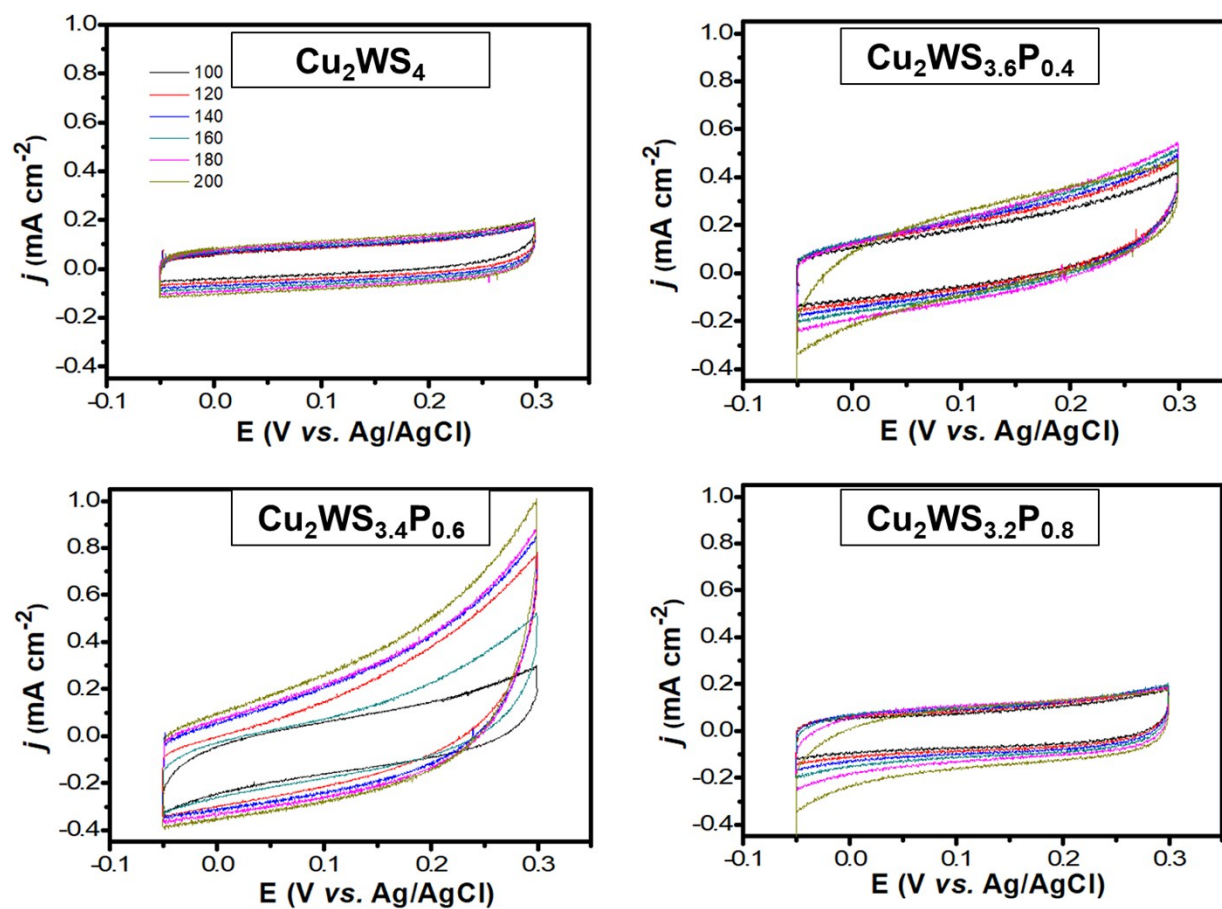

Figure S4: CV curves of all 4 tested samples.

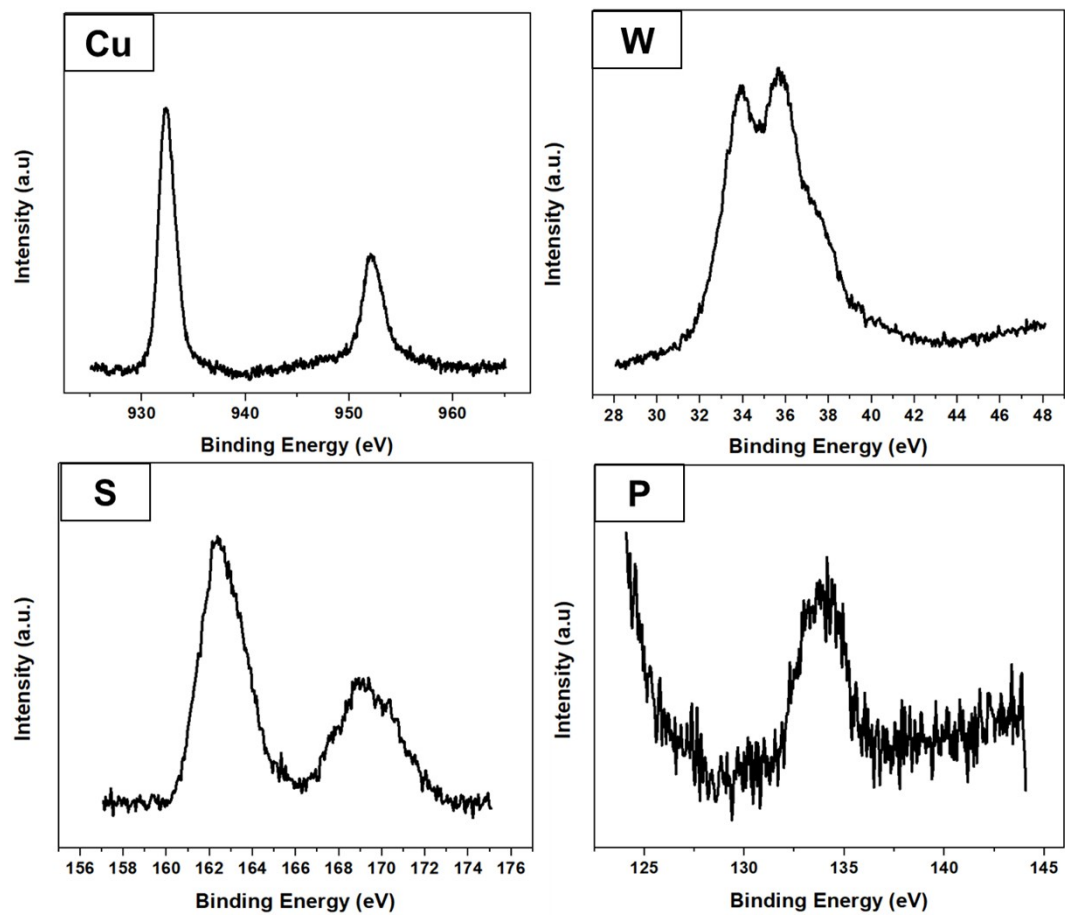

**Figure S5:** Elemental XPS scans after the stability test.
